# Supplementary material
Source: MDPI journal article supplement (https://www.mdpi.com/1999-4907/9/5/278)
Supplement: s1 [file s1]

Supplementary Materials:

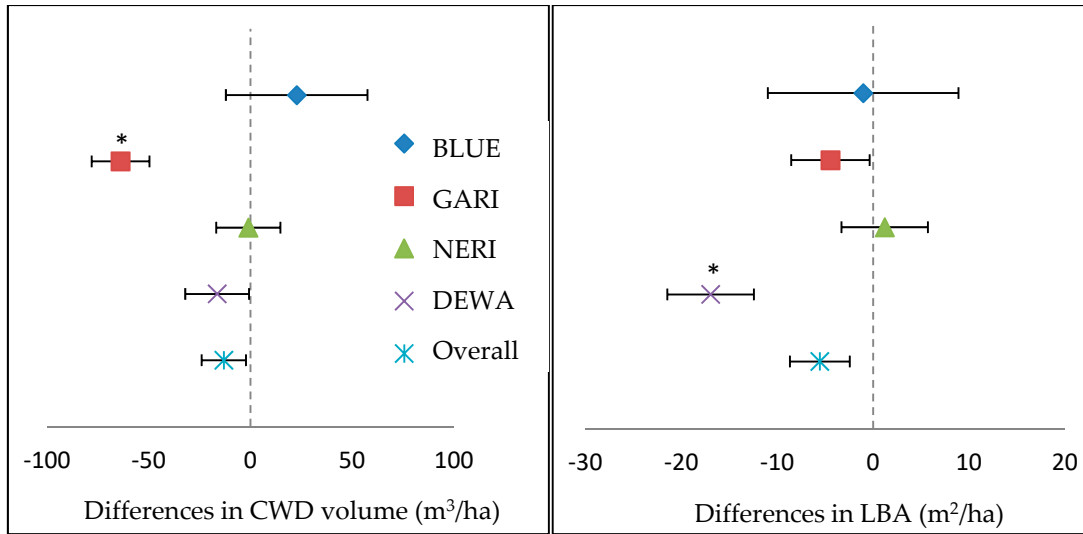

**Figure S1.** Tukey Method comparison for differences of means (undisturbed - disturbed) for average CWD volume ( $\text{m}^3/\text{ha}$ ) (left panel) and LBA ( $\text{m}^2/\text{ha}$ ) (right panel) for all undisturbed plots versus the disturbed plots for each NPS unit and for all the units combined prior to the disturbance events. The error bars represent  $\pm$  one standard error of the difference. Asterisks represent a p-value of  $<0.05$ . Table 1 contains a list of the means and sample sizes. Appendix A, Table 1A contains the values for the differences of means, standard error, and p-values.

**Table S1.** Means and sample sizes for LBA and CWD volume before the disturbance events, as well as the change following those events. The sample size for DEWA was lower for LBA than for CWD because plots with no trees were excluded from LBA calculations. The numbers in parentheses represent one standard error of the mean.

| NPS unit | Condition   | N        | Mean LBA                                        | Change in                                                 | Mean CWD                                               | Change in                                                        |
|----------|-------------|----------|-------------------------------------------------|-----------------------------------------------------------|--------------------------------------------------------|------------------------------------------------------------------|
|          |             |          | ( $\text{m}^2\text{-ha}^{-1}$ ) pre-disturbance | mean LBA ( $\text{m}^2\text{-ha}^{-1}$ ) post-disturbance | volume ( $\text{m}^3\text{-ha}^{-1}$ ) pre-disturbance | mean CWD volume ( $\text{m}^3\text{-ha}^{-1}$ ) post-disturbance |
| BLUE     | Disturbed   | 1        | 33.0 (N/A)                                      | -13.4 (N/A)                                               | 0.8 (N/A)                                              | 87.3 (N/A)                                                       |
| BLUE     | Undisturbed | 39       | 32.0 (1.3)                                      | 0.6 (0.4)                                                 | 23.5 (3.4)                                             | 7.6 (3.8)                                                        |
| GARI     | Disturbed   | 7        | 36.1 (3.8)                                      | -4.4 (3.1)                                                | 117.4 (25.8)                                           | 36.2 (32.0)                                                      |
| GARI     | Undisturbed | 33       | 30.8 (1.7)                                      | 1.1 (0.8)                                                 | 53.5 (12.4)                                            | 2.1 (6.6)                                                        |
| NERI     | Disturbed   | 5        | 29.6 (2.3)                                      | -3.0 (2.3)                                                | 26.9 (7.7)                                             | 74.1 (42.0)                                                      |
| NERI     | Undisturbed | 93       | 30.6 (0.9)                                      | 0.1 (0.2)                                                 | 25.8 (2.9)                                             | 3.9 (2.2)                                                        |
| DEWA     | Disturbed   | 5        | 41.6 (9.9)                                      | -7.2 (1.7)                                                | 36.0 (12.6)                                            | 86.6 (28.0)                                                      |
| DEWA     | Undisturbed | 87/92    | 24.7 (1.2)                                      | 0.9 (0.2)                                                 | 19.6 (2.0)                                             | 3.5 (1.4)                                                        |
| Overall  | Disturbed   | 18       | 35.1 (3.2)                                      | -7.0 (1.5)                                                | 45.3 (14.8)                                            | 71.1 (18.3)                                                      |
| Overall  | Undisturbed | 257/ 262 | 29.5 (0.6)                                      | 0.7 (0.5)                                                 | 30.6 (34.7)                                            | 4.3 (22.2)                                                       |

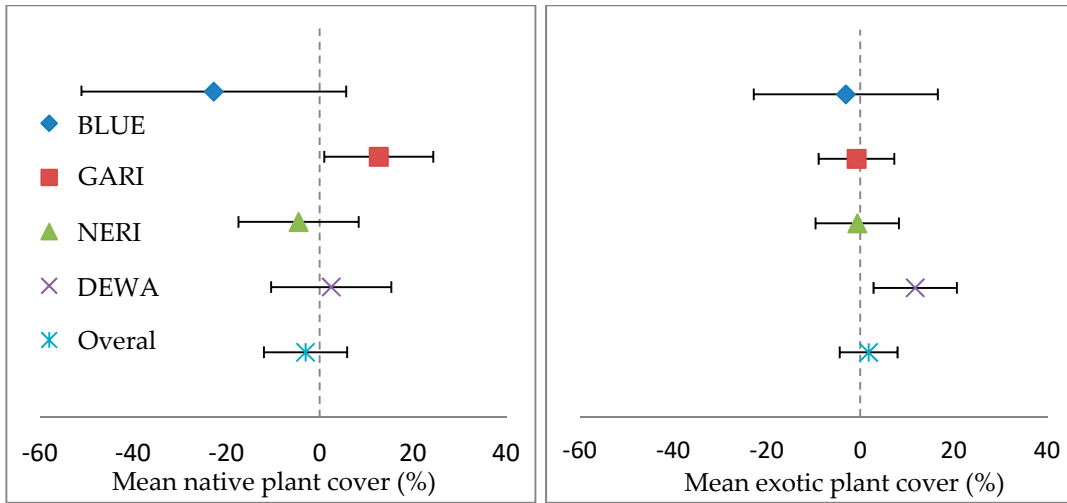

**Figure S2.** Tukey Method comparison for differences of means (disturbed-undisturbed) for average native (left panel) and exotic (right panel) plant cover (%) between disturbed and undisturbed plots for each NPS unit and for all the units combined prior to the disturbance events. There were no significant differences observed between the disturbed and undisturbed plots. The error bars represent +/- one standard error of the difference. Table 2 contains a list of the means and sample sizes. Appendix A, Table 2A contains the values for the differences of means, standard error, and p-values.

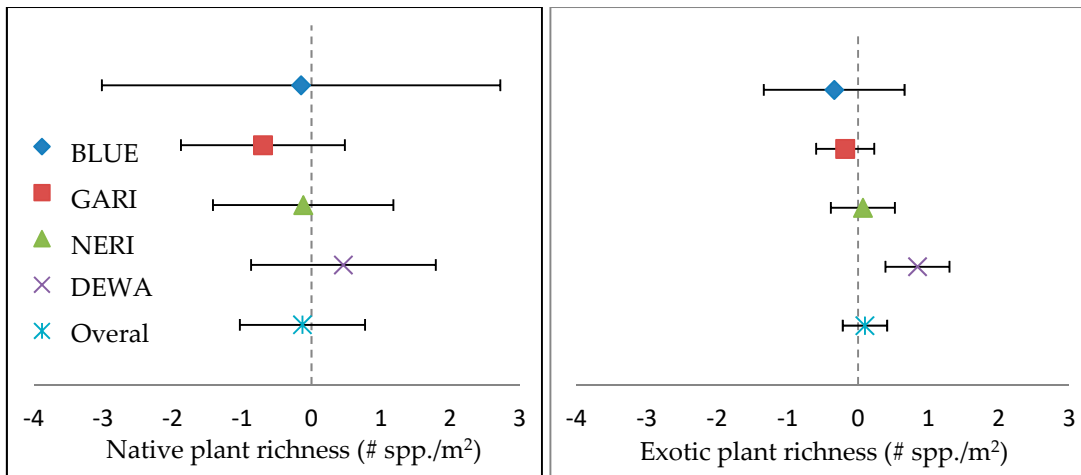

**Figure S3.** Tukey Method comparison for differences of means (disturbed-undisturbed) in average plant richness (number of species per m<sup>2</sup>) between disturbed and undisturbed plots for each NPS unit and for all the units combined prior to the disturbance events. Error bars represent +/- one standard error of the difference. Table 2 contains a list of the means and sample sizes. Appendix A, Table 3A contains the values for the differences of means, standard error, and p-values.

**Table S2.** Tukey Method analysis means and sample sizes for average species richness (number of species per m<sup>2</sup>) and average cover for native and exotic plants (%) prior to the disturbance events as well as the changes following those events. The numbers in parentheses represent one standard error of the mean.

| NPS unit | Condition   | N   | Status | Mean species richness (# spp./ m <sup>2</sup> )pre-disturbance | Mean species cover (% cover)pre-disturbance | Mean species richness (# spp./ m <sup>2</sup> ) change post-disturbance | Mean change in plant species cover (% cover)post-disturbance |
|----------|-------------|-----|--------|----------------------------------------------------------------|---------------------------------------------|-------------------------------------------------------------------------|--------------------------------------------------------------|
| BLUE     | Disturbed   | 1   | Native | 7.6 (N/A)                                                      | 18.4 (N/A)                                  | -0.1 (N/A)                                                              | 18.1 (N/A)                                                   |
| BLUE     | Undisturbed | 39  | Native | 7.4 (0.6)                                                      | 41.1 (5.4)                                  | 0.5 (0.2)                                                               | -3.0 (2.9)                                                   |
| BLUE     | Disturbed   | 1   | Exotic | 0.2 (N/A)                                                      | 0.1 (N/A)                                   | 0.0 (N/A)                                                               | 1.7 (N/A)                                                    |
| BLUE     | Undisturbed | 39  | Exotic | 0.5 (0.1)                                                      | 3.2 (1.0)                                   | 0.1 (0.1)                                                               | 1.5 (0.9)                                                    |
| GARI     | Disturbed   | 7   | Native | 5.5 (1.5)                                                      | 42.6 (10.1)                                 | 1.4 (0.4)                                                               | 6.1 (3.9)                                                    |
| GARI     | Undisturbed | 33  | Native | 6.2 (0.5)                                                      | 29.8 (3.1)                                  | 0.6 (0.3)                                                               | 7.0 (2.9)                                                    |
| GARI     | Disturbed   | 7   | Exotic | 0.0 (0.0)                                                      | 0.1 (0.1)                                   | 0.0 (0.1)                                                               | 0.7 (0.7)                                                    |
| GARI     | Undisturbed | 33  | Exotic | 0.2 (0.1)                                                      | 0.9 (0.3)                                   | 0.1 (0.0)                                                               | 1.6 (0.9)                                                    |
| NERI     | Disturbed   | 5   | Native | 6.6 (1.1)                                                      | 25.4 (9.5)                                  | 0.8 (0.9)                                                               | 31.6 (15.2)                                                  |
| NERI     | Undisturbed | 93  | Native | 6.7 (0.3)                                                      | 29.9 (2.1)                                  | 0.4 (0.2)                                                               | 2.9 (1.4)                                                    |
| NERI     | Disturbed   | 5   | Exotic | 0.3 (0.2)                                                      | 0.6 (0.5)                                   | 0.0 (0.1)                                                               | 7.6 (7.6)                                                    |
| NERI     | Undisturbed | 93  | Exotic | 0.2 (0.1)                                                      | 1.3 (0.5)                                   | 0.0 (0.0)                                                               | 0.5 (0.4)                                                    |
| DEWA     | Disturbed   | 5   | Native | 6.3 (0.7)                                                      | 50.4 (10.4)                                 | -0.4 (0.1)                                                              | -12.3 (6.9)                                                  |
| DEWA     | Undisturbed | 97  | Native | 5.8 (0.3)                                                      | 47.9 (3.5)                                  | -0.4 (0.6)                                                              | -16.6 (2.2)                                                  |
| DEWA     | Disturbed   | 5   | Exotic | 1.9 (0.4)                                                      | 30.5 (8.7)                                  | 0.0 (0.1)                                                               | -8.7 (3.6)                                                   |
| DEWA     | Undisturbed | 97  | Exotic | 1.0 (0.1)                                                      | 18.7 (3.2)                                  | 0.0 (0.1)                                                               | -1.3 (1.2)                                                   |
| Overall  | Disturbed   | 18  | Native | 6.5 (0.7)                                                      | 34.2 (5.8)                                  | 0.5 (0.4)                                                               | 9.8 (6.3)                                                    |
| Overall  | Undisturbed | 262 | Native | 6.6 (0.2)                                                      | 37.2 (1.8)                                  | 0.3 (0.1)                                                               | -1.4 (1.2)                                                   |
| Overall  | Disturbed   | 18  | Exotic | 0.6 (0.23)                                                     | 7.8 (3.96)                                  | 0.0 (0.04)                                                              | 0.3 (2.63)                                                   |
| Overall  | Undisturbed | 262 | Exotic | 0.5 (0.07)                                                     | 6.0 (1.32)                                  | 0.1 (0.03)                                                              | 0.6 (0.51)                                                   |
